# Supplementary material
Source: PubMed Central journal article supplement (PMC10895462)
Supplement: NIHMS1963972-supplement-Supplemental_Information.pdf [file NIHMS1963972-supplement-Supplemental_Information.pdf]

In the format provided by the authors and unedited.

# Genome-wide profiling of nucleosome position and chromatin accessibility in single cells using scMNase-seq

Weiwu Gao<sup>1,2,3,4</sup>, Binbin Lai<sup>2</sup>, Bing Ni<sup>1,4\*</sup> and Keji Zhao<sup>2\*</sup>

---

<sup>1</sup>Department of Pathophysiology, College of High Altitude Military Medicine, Third Military Medical University, Chongqing, People's Republic of China. <sup>2</sup>Laboratory of Epigenome Biology, Systems Biology Center, National Heart, Lung and Blood Institute, NIH, Bethesda, MD, USA. <sup>3</sup>Institute of Immunology of PLA, Third Military Medical University, Chongqing, People's Republic of China. <sup>4</sup>Key Laboratory of Extreme Environmental Medicine, Ministry of Education of China, Chongqing, People's Republic of China. \*e-mail: [nibing@tmmu.edu.cn](mailto:nibing@tmmu.edu.cn); [zhaok@nhlbi.nih.gov](mailto:zhaok@nhlbi.nih.gov)

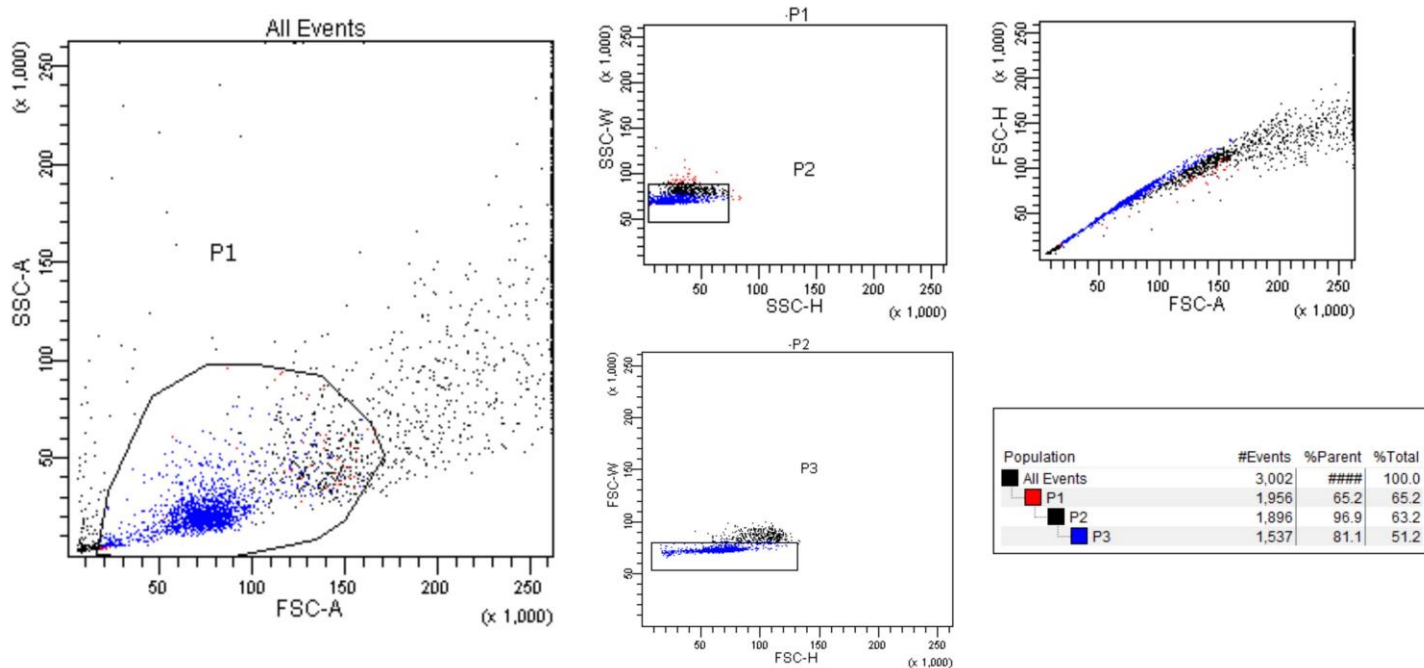

### Supplementary Figure 1

FACS sorting single cells by forward versus side scatter (FSC vs SSC) gating.

Formaldehyde-fixed mouse naïve T cells (100K) were submitted for FACS sorting based on size and granularity (FSC vs SSC, P1 gate), and cell doublets were excluded firstly by SSC-H vs SSC-W (P2 gate) and further by FSC-H vs FSC-W (P3 gate)

**Supplementary Table 1, oligo sequence for primers and adaptors used in this protocol.**

|                         |                                                                   |       |      |         |                   |
|-------------------------|-------------------------------------------------------------------|-------|------|---------|-------------------|
| illumina adapter-top    | /5Phos/GAT CGG AAG AGC ACA CGT CT                                 | 250nm | STD  |         |                   |
| illumina adapter-bottom | ACACTCTTCCCTACACGACGCTCTCCGATCT                                   | 250nm | STD  |         |                   |
|                         |                                                                   |       |      |         |                   |
| illumina PCR Primer 1.0 | AATGATACGGCGACCACCGAGATCTACACTCTTCCCTACACGACGCTCTCCGATC*T         | 1um   | HPLC |         |                   |
|                         |                                                                   |       |      | i7 name | i7 index sequence |
| Primer 2.0- IndexM1     | CAAGCAGAAGACGGCATAACGAGATCGTGATGTGACTGGAGTTCAGACGTGTGCTCTCCGATC*T | 250nm | HPLC | M1      | ATCACG            |
| Primer 2.0- IndexM2     | CAAGCAGAAGACGGCATAACGAGATACATCGGTGACTGGAGTTCAGACGTGTGCTCTCCGATC*T | 250nm | HPLC | M2      | CGATGT            |
| Primer 2.0- IndexM3     | CAAGCAGAAGACGGCATAACGAGATGCCTAAGTGACTGGAGTTCAGACGTGTGCTCTCCGATC*T | 250nm | HPLC | M3      | TTAGGC            |
| Primer 2.0- IndexM4     | CAAGCAGAAGACGGCATAACGAGATTGGTCAGTGACTGGAGTTCAGACGTGTGCTCTCCGATC*T | 250nm | HPLC | M4      | TGACCA            |
| Primer 2.0- IndexM5     | CAAGCAGAAGACGGCATAACGAGATCACTGTGTGACTGGAGTTCAGACGTGTGCTCTCCGATC*T | 250nm | HPLC | M5      | ACAGTG            |
| Primer 2.0- IndexM6     | CAAGCAGAAGACGGCATAACGAGATATTGGCGTGACTGGAGTTCAGACGTGTGCTCTCCGATC*T | 250nm | HPLC | M6      | GCCAAT            |
| Primer 2.0- IndexM7     | CAAGCAGAAGACGGCATAACGAGATGATCTGGTGACTGGAGTTCAGACGTGTGCTCTCCGATC*T | 250nm | HPLC | M7      | CAGATC            |
| Primer 2.0- IndexM8     | CAAGCAGAAGACGGCATAACGAGATCAAGTGTGACTGGAGTTCAGACGTGTGCTCTCCGATC*T  | 250nm | HPLC | M8      | ACTTGA            |
| Primer 2.0- IndexM9     | CAAGCAGAAGACGGCATAACGAGATCTGATCGTGACTGGAGTTCAGACGTGTGCTCTCCGATC*T | 250nm | HPLC | M9      | GATCAG            |
| Primer 2.0- IndexM10    | CAAGCAGAAGACGGCATAACGAGATAAGCTAGTGACTGGAGTTCAGACGTGTGCTCTCCGATC*T | 250nm | HPLC | M10     | TAGCTT            |
| Primer 2.0- IndexM11    | CAAGCAGAAGACGGCATAACGAGATGTAGCCGTGACTGGAGTTCAGACGTGTGCTCTCCGATC*T | 250nm | HPLC | M11     | GGCTAC            |
| Primer 2.0- IndexM12    | CAAGCAGAAGACGGCATAACGAGATTACAAGGTGACTGGAGTTCAGACGTGTGCTCTCCGATC*T | 250nm | HPLC | M12     | CTTGTA            |
|                         |                                                                   |       |      |         |                   |
| Primer 2.0-IndexM14     | CAAGCAGAAGACGGCATAACGAGATGGAAGTGTGACTGGAGTTCAGACGTGTGCTCTCCGATC*T | 250nm | HPLC | M14     | AGTTCC            |
| Primer 2.0-IndexM18     | CAAGCAGAAGACGGCATAACGAGATGCGGACGTGACTGGAGTTCAGACGTGTGCTCTCCGATC*T | 250nm | HPLC | M18     | GTCCGC            |
| Primer 2.0-IndexM23     | CAAGCAGAAGACGGCATAACGAGATCCACTCGTGACTGGAGTTCAGACGTGTGCTCTCCGATC*T | 250nm | HPLC | M23     | GAGTGG            |
| Primer 2.0-IndexM25     | CAAGCAGAAGACGGCATAACGAGATATCAGTGTGACTGGAGTTCAGACGTGTGCTCTCCGATC*T | 250nm | HPLC | M25     | ACTGAT            |
| Primer 2.0-IndexM27     | CAAGCAGAAGACGGCATAACGAGATAGGAATGTGACTGGAGTTCAGACGTGTGCTCTCCGATC*T | 250nm | HPLC | M27     | ATTCTT            |
| Primer 2.0-IndexM29     | CAAGCAGAAGACGGCATAACGAGATTAGTTGGTGACTGGAGTTCAGACGTGTGCTCTCCGATC*T | 250nm | HPLC | M29     | CAACTA            |
| Primer 2.0-IndexM37     | CAAGCAGAAGACGGCATAACGAGATATCCGGTGACTGGAGTTCAGACGTGTGCTCTCCGATC*T  | 250nm | HPLC | M37     | CGGAAT            |
| Primer 2.0-IndexM40     | CAAGCAGAAGACGGCATAACGAGATTCTGAGGTGACTGGAGTTCAGACGTGTGCTCTCCGATC*T | 250nm | HPLC | M40     | CTCAGA            |
| Primer 2.0-IndexM42     | CAAGCAGAAGACGGCATAACGAGATCGATTAGTGACTGGAGTTCAGACGTGTGCTCTCCGATC*T | 250nm | HPLC | M42     | TAATCG            |
| Primer 2.0-IndexM45     | CAAGCAGAAGACGGCATAACGAGATGAATGAGTGACTGGAGTTCAGACGTGTGCTCTCCGATC*T | 250nm | HPLC | M45     | TCATTC            |
| Primer 2.0-IndexM46     | CAAGCAGAAGACGGCATAACGAGATTCGGGAGTGACTGGAGTTCAGACGTGTGCTCTCCGATC*T | 250nm | HPLC | M46     | TCCCGA            |
| Primer 2.0-IndexM47     | CAAGCAGAAGACGGCATAACGAGATCTTCGAGTGACTGGAGTTCAGACGTGTGCTCTCCGATC*T | 250nm | HPLC | M47     | TCGAAG            |
|                         |                                                                   |       |      |         |                   |

|                     |                                                                   |       |      |     |        |
|---------------------|-------------------------------------------------------------------|-------|------|-----|--------|
| Primer 2.0-IndexM13 | CAAGCAGAAGACGGCATAACGAGATTTGACTGTGACTGGAGTTCAGACGTGTGCTCTCCGATC*T | 250nm | HPLC | M13 | AGTCAA |
| Primer 2.0-IndexM17 | CAAGCAGAAGACGGCATAACGAGATCTCTACGTGACTGGAGTTCAGACGTGTGCTCTCCGATC*T | 250nm | HPLC | M17 | GTAGAG |
| Primer 2.0-IndexM21 | CAAGCAGAAGACGGCATAACGAGATCGAAACGTGACTGGAGTTCAGACGTGTGCTCTCCGATC*T | 250nm | HPLC | M21 | GTTTCG |
| Primer 2.0-IndexM26 | CAAGCAGAAGACGGCATAACGAGATGCTCATGTGACTGGAGTTCAGACGTGTGCTCTCCGATC*T | 250nm | HPLC | M26 | ATGAGC |
| Primer 2.0-IndexM30 | CAAGCAGAAGACGGCATAACGAGATCCGGTGGTACTGGAGTTCAGACGTGTGCTCTCCGATC*T  | 250nm | HPLC | M30 | CACCGG |
| Primer 2.0-IndexM31 | CAAGCAGAAGACGGCATAACGAGATATCGTGGTACTGGAGTTCAGACGTGTGCTCTCCGATC*T  | 250nm | HPLC | M31 | CACGAT |
| Primer 2.0-IndexM35 | CAAGCAGAAGACGGCATAACGAGATAAAATGGTACTGGAGTTCAGACGTGTGCTCTCCGATC*T  | 250nm | HPLC | M35 | CATTTT |
| Primer 2.0-IndexM38 | CAAGCAGAAGACGGCATAACGAGATAGCTAGGTGACTGGAGTTCAGACGTGTGCTCTCCGATC*T | 250nm | HPLC | M38 | CTAGCT |
| Primer 2.0-IndexM41 | CAAGCAGAAGACGGCATAACGAGATTAGCGCTGACTGGAGTTCAGACGTGTGCTCTCCGATC*T  | 250nm | HPLC | M41 | GCGCTA |
| Primer 2.0-IndexM43 | CAAGCAGAAGACGGCATAACGAGATGCTGTAGTGACTGGAGTTCAGACGTGTGCTCTCCGATC*T | 250nm | HPLC | M43 | TACAGC |
| Primer 2.0-IndexM44 | CAAGCAGAAGACGGCATAACGAGATATTATAGTGACTGGAGTTCAGACGTGTGCTCTCCGATC*T | 250nm | HPLC | M44 | TATAAT |
| Primer 2.0-IndexM48 | CAAGCAGAAGACGGCATAACGAGATTGCCAGTGACTGGAGTTCAGACGTGTGCTCTCCGATC*T  | 250nm | HPLC | M48 | TCGGCA |
|                     |                                                                   |       |      |     |        |
| Primer 2.0-IndexG1  | CAAGCAGAAGACGGCATAACGAGATCGTACCCTGACTGGAGTTCAGACGTGTGCTCTCCGATC*T | 100nm | HPLC | G1  | GGTACG |
| Primer 2.0-IndexG2  | CAAGCAGAAGACGGCATAACGAGATGCCACGGTACTGGAGTTCAGACGTGTGCTCTCCGATC*T  | 100nm | HPLC | G2  | CGTGGC |
| Primer 2.0-IndexG3  | CAAGCAGAAGACGGCATAACGAGATGATGGCGTACTGGAGTTCAGACGTGTGCTCTCCGATC*T  | 100nm | HPLC | G3  | GCCATC |
| Primer 2.0-IndexG4  | CAAGCAGAAGACGGCATAACGAGATCAGTGAGTGACTGGAGTTCAGACGTGTGCTCTCCGATC*T | 100nm | HPLC | G4  | TCACTG |
| Primer 2.0-IndexG5  | CAAGCAGAAGACGGCATAACGAGATAAGTCTGTGACTGGAGTTCAGACGTGTGCTCTCCGATC*T | 100nm | HPLC | G5  | AGACTT |
| Primer 2.0-IndexG6  | CAAGCAGAAGACGGCATAACGAGATCTAGCTGTGACTGGAGTTCAGACGTGTGCTCTCCGATC*T | 100nm | HPLC | G6  | AGCTAG |
| Primer 2.0-IndexG7  | CAAGCAGAAGACGGCATAACGAGATACTGGTGTGACTGGAGTTCAGACGTGTGCTCTCCGATC*T | 100nm | HPLC | G7  | ACCAGT |
| Primer 2.0-IndexG8  | CAAGCAGAAGACGGCATAACGAGATAGTGTGCTGACTGGAGTTCAGACGTGTGCTCTCCGATC*T | 100nm | HPLC | G8  | GACACT |
| Primer 2.0-IndexG9  | CAAGCAGAAGACGGCATAACGAGATGGATCGGTACTGGAGTTCAGACGTGTGCTCTCCGATC*T  | 100nm | HPLC | G9  | CGATCC |
| Primer 2.0-IndexG10 | CAAGCAGAAGACGGCATAACGAGATCAGTTGTGACTGGAGTTCAGACGTGTGCTCTCCGATC*T  | 100nm | HPLC | G10 | AACCTG |
| Primer 2.0-IndexG11 | CAAGCAGAAGACGGCATAACGAGATCGTATGGTACTGGAGTTCAGACGTGTGCTCTCCGATC*T  | 100nm | HPLC | G11 | CATACG |
| Primer 2.0-IndexG12 | CAAGCAGAAGACGGCATAACGAGATAGTGTGCTGACTGGAGTTCAGACGTGTGCTCTCCGATC*T | 100nm | HPLC | G12 | ACGACT |
| Primer 2.0-IndexG13 | CAAGCAGAAGACGGCATAACGAGATGGCTATGTGACTGGAGTTCAGACGTGTGCTCTCCGATC*T | 100nm | HPLC | G13 | ATAGCC |
| Primer 2.0-IndexG14 | CAAGCAGAAGACGGCATAACGAGATACTGTGGTACTGGAGTTCAGACGTGTGCTCTCCGATC*T  | 100nm | HPLC | G14 | CACAGT |
| Primer 2.0-IndexG15 | CAAGCAGAAGACGGCATAACGAGATGACAATGTGACTGGAGTTCAGACGTGTGCTCTCCGATC*T | 100nm | HPLC | G15 | ATTGTC |
| Primer 2.0-IndexG16 | CAAGCAGAAGACGGCATAACGAGATAGTCTGGTACTGGAGTTCAGACGTGTGCTCTCCGATC*T  | 100nm | HPLC | G16 | CAGACT |
| Primer 2.0-IndexG17 | CAAGCAGAAGACGGCATAACGAGATTGCAACGTACTGGAGTTCAGACGTGTGCTCTCCGATC*T  | 100nm | HPLC | G17 | GTTGCA |
| Primer 2.0-IndexG18 | CAAGCAGAAGACGGCATAACGAGATGTTATCGTGACTGGAGTTCAGACGTGTGCTCTCCGATC*T | 100nm | HPLC | G18 | GATAAC |
| Primer 2.0-IndexG19 | CAAGCAGAAGACGGCATAACGAGATCTTGAGGTACTGGAGTTCAGACGTGTGCTCTCCGATC*T  | 100nm | HPLC | G19 | CTCAAG |

|                       |                                                                   |       |      |       |        |
|-----------------------|-------------------------------------------------------------------|-------|------|-------|--------|
| Primer 2.0-IndexG20   | CAAGCAGAAGACGGCATAACGAGATGTTAGGGTGACTGGAGTTCAGACGTGTGCTCTCCGATC*T | 100nm | HPLC | G20   | CCTAAC |
| Primer 2.0-IndexG21   | CAAGCAGAAGACGGCATAACGAGATCTGGGTGTGACTGGAGTTCAGACGTGTGCTCTCCGATC*T | 100nm | HPLC | G21   | ACCCAG |
| Primer 2.0-IndexG22   | CAAGCAGAAGACGGCATAACGAGATGCTCGAGTGACTGGAGTTCAGACGTGTGCTCTCCGATC*T | 100nm | HPLC | G22   | TCGAGC |
| Primer 2.0-IndexG23   | CAAGCAGAAGACGGCATAACGAGATCCTAGTGTGACTGGAGTTCAGACGTGTGCTCTCCGATC*T | 100nm | HPLC | G23   | ACTAGG |
| Primer 2.0-IndexG24   | CAAGCAGAAGACGGCATAACGAGATAAGTGCCTGACTGGAGTTCAGACGTGTGCTCTCCGATC*T | 100nm | HPLC | G24   | GCACTT |
| Primer 2.0-IndexG25   | CAAGCAGAAGACGGCATAACGAGATCGGTGCCTGACTGGAGTTCAGACGTGTGCTCTCCGATC*T | 100nm | HPLC | G25   | GCACCG |
| Primer 2.0-IndexG26   | CAAGCAGAAGACGGCATAACGAGATACTTGGGTGACTGGAGTTCAGACGTGTGCTCTCCGATC*T | 100nm | HPLC | G26   | CCAAGT |
| Primer 2.0-IndexG27   | CAAGCAGAAGACGGCATAACGAGATCAATCCGTGACTGGAGTTCAGACGTGTGCTCTCCGATC*T | 100nm | HPLC | G27   | GGATTG |
| Primer 2.0-IndexG28   | CAAGCAGAAGACGGCATAACGAGATTGTGCAGTGACTGGAGTTCAGACGTGTGCTCTCCGATC*T | 100nm | HPLC | G28   | TGCACA |
| Primer 2.0-IndexG29   | CAAGCAGAAGACGGCATAACGAGATGAATACGTGACTGGAGTTCAGACGTGTGCTCTCCGATC*T | 100nm | HPLC | G29   | GTATTC |
| Primer 2.0-IndexG30   | CAAGCAGAAGACGGCATAACGAGATCCTACGGTGACTGGAGTTCAGACGTGTGCTCTCCGATC*T | 100nm | HPLC | G30   | CGTAGG |
| Primer 2.0-IndexG31   | CAAGCAGAAGACGGCATAACGAGATCTAAGAGTGACTGGAGTTCAGACGTGTGCTCTCCGATC*T | 100nm | HPLC | G31   | TCTTAG |
| Primer 2.0-IndexG32   | CAAGCAGAAGACGGCATAACGAGATAGTCCGTGACTGGAGTTCAGACGTGTGCTCTCCGATC*T  | 100nm | HPLC | G32   | GGACCT |
| Primer 2.0-IndexG33   | CAAGCAGAAGACGGCATAACGAGATACGGTAGTGACTGGAGTTCAGACGTGTGCTCTCCGATC*T | 100nm | HPLC | G33   | TACCGT |
| Primer 2.0-IndexG34   | CAAGCAGAAGACGGCATAACGAGATGACCCAGTGACTGGAGTTCAGACGTGTGCTCTCCGATC*T | 100nm | HPLC | G34   | TGGGTC |
| Primer 2.0-IndexG35   | CAAGCAGAAGACGGCATAACGAGATTTAGCGGTGACTGGAGTTCAGACGTGTGCTCTCCGATC*T | 100nm | HPLC | G35   | CGCTAA |
| Primer 2.0-IndexG36   | CAAGCAGAAGACGGCATAACGAGATAGTCTAGTGACTGGAGTTCAGACGTGTGCTCTCCGATC*T | 100nm | HPLC | G36   | TAGACT |
|                       |                                                                   |       |      |       |        |
| Primer 2.0-Indexnew1  | CAAGCAGAAGACGGCATAACGAGATGTACGTGTGACTGGAGTTCAGACGTGTGCTCTCCGATC*T | 100nm | HPLC | new1  | ACGTAC |
| Primer 2.0-Indexnew2  | CAAGCAGAAGACGGCATAACGAGATCAGCCTGTGACTGGAGTTCAGACGTGTGCTCTCCGATC*T | 100nm | HPLC | new2  | AGGCTG |
| Primer 2.0-Indexnew3  | CAAGCAGAAGACGGCATAACGAGATACGTATGTGACTGGAGTTCAGACGTGTGCTCTCCGATC*T | 100nm | HPLC | new3  | ATACGT |
| Primer 2.0-Indexnew4  | CAAGCAGAAGACGGCATAACGAGATCTATGGGTGACTGGAGTTCAGACGTGTGCTCTCCGATC*T | 100nm | HPLC | new4  | CCATAG |
| Primer 2.0-Indexnew5  | CAAGCAGAAGACGGCATAACGAGATCTGCAGGTGACTGGAGTTCAGACGTGTGCTCTCCGATC*T | 100nm | HPLC | new5  | CTGCAG |
| Primer 2.0-Indexnew6  | CAAGCAGAAGACGGCATAACGAGATATACAGGTGACTGGAGTTCAGACGTGTGCTCTCCGATC*T | 100nm | HPLC | new6  | CTGTAT |
| Primer 2.0-Indexnew7  | CAAGCAGAAGACGGCATAACGAGATCATGTCTGACTGGAGTTCAGACGTGTGCTCTCCGATC*T  | 100nm | HPLC | new7  | GACATG |
| Primer 2.0-Indexnew8  | CAAGCAGAAGACGGCATAACGAGATGACGTCGTGACTGGAGTTCAGACGTGTGCTCTCCGATC*T | 100nm | HPLC | new8  | GACGTC |
| Primer 2.0-Indexnew9  | CAAGCAGAAGACGGCATAACGAGATTATACCGTGACTGGAGTTCAGACGTGTGCTCTCCGATC*T | 100nm | HPLC | new9  | GGTATA |
| Primer 2.0-Indexnew10 | CAAGCAGAAGACGGCATAACGAGATAGCATAGTGACTGGAGTTCAGACGTGTGCTCTCCGATC*T | 100nm | HPLC | new10 | TATGCT |
| Primer 2.0-Indexnew11 | CAAGCAGAAGACGGCATAACGAGATGTCGGAGTGACTGGAGTTCAGACGTGTGCTCTCCGATC*T | 100nm | HPLC | new11 | TCCGAC |
| Primer 2.0-Indexnew12 | CAAGCAGAAGACGGCATAACGAGATCATGCAGTGACTGGAGTTCAGACGTGTGCTCTCCGATC*T | 100nm | HPLC | new12 | TGCATG |
| Primer 2.0-Indexnew13 | CAAGCAGAAGACGGCATAACGAGATTATGTTGTGACTGGAGTTCAGACGTGTGCTCTCCGATC*T | 100nm | HPLC | new13 | AACATA |
| Primer 2.0-Indexnew14 | CAAGCAGAAGACGGCATAACGAGATGCGTGTGTGACTGGAGTTCAGACGTGTGCTCTCCGATC*T | 100nm | HPLC | new14 | ACACGC |

|                       |                                                                    |       |      |       |        |
|-----------------------|--------------------------------------------------------------------|-------|------|-------|--------|
| Primer 2.0-Indexnew15 | CAAGCAGAAGACGGCATAACGAGATAGAGGTGTGACTGGAGTTCAGACGTGTGCTCTTCCGATC*T | 100nm | HPLC | new15 | ACCTCT |
| Primer 2.0-Indexnew16 | CAAGCAGAAGACGGCATAACGAGATTGATGGGTGACTGGAGTTCAGACGTGTGCTCTTCCGATC*T | 100nm | HPLC | new16 | CCATCA |
| Primer 2.0-Indexnew17 | CAAGCAGAAGACGGCATAACGAGATCTGTCGGTGACTGGAGTTCAGACGTGTGCTCTTCCGATC*T | 100nm | HPLC | new17 | CGACAG |
| Primer 2.0-Indexnew18 | CAAGCAGAAGACGGCATAACGAGATACGCAGGTGACTGGAGTTCAGACGTGTGCTCTTCCGATC*T | 100nm | HPLC | new18 | CTGCGT |
| Primer 2.0-Indexnew19 | CAAGCAGAAGACGGCATAACGAGATTGCGTCGTGACTGGAGTTCAGACGTGTGCTCTTCCGATC*T | 100nm | HPLC | new19 | GACGCA |
| Primer 2.0-Indexnew20 | CAAGCAGAAGACGGCATAACGAGATTGCGCCGTGACTGGAGTTCAGACGTGTGCTCTTCCGATC*T | 100nm | HPLC | new20 | GGCGCA |
| Primer 2.0-Indexnew21 | CAAGCAGAAGACGGCATAACGAGATACTACCGTGACTGGAGTTCAGACGTGTGCTCTTCCGATC*T | 100nm | HPLC | new21 | GGTAGT |
| Primer 2.0-Indexnew22 | CAAGCAGAAGACGGCATAACGAGATCACATAGTGACTGGAGTTCAGACGTGTGCTCTTCCGATC*T | 100nm | HPLC | new22 | TATGTG |
| Primer 2.0-Indexnew23 | CAAGCAGAAGACGGCATAACGAGATTCTACAGTGACTGGAGTTCAGACGTGTGCTCTTCCGATC*T | 100nm | HPLC | new23 | TGTAGA |
| Primer 2.0-Indexnew24 | CAAGCAGAAGACGGCATAACGAGATTTACAAGTGACTGGAGTTCAGACGTGTGCTCTTCCGATC*T | 100nm | HPLC | new24 | TTGTAA |
